# Supplementary material for: Food Matrices Affect the Peptides Produced during the Digestion of Arthrospira platensis-Based Functional Aliments
Source: MDPI journal article supplement (doi:10.3390/nu13113919), 2021-11-01
Supplement: s1 [file s1]

**Supplementary information**

**Food matrices affect the peptides production during  
the digestion of *Arthrospira platensis*-based functional  
aliments**

*Giuliana Donadio, Valentina Santoro, Fabrizio Dal Piaz\*, Nunziatina De Tommasi*

**Table S1:** List of peptides derived from the simulated gastrointestinal digestion of spirulina identified by nanoLC-hrMS/MS analysis and bioinformatics elaboration of the data. Different peptides were grouped based on the protein they belong to.

**Protein Gene: PHAA\_ARTPT**

| Start | End | Observed | Mr (expt) | Mr (calc) | ppm   | M | Score | Expect | Rank | U | Peptide         |
|-------|-----|----------|-----------|-----------|-------|---|-------|--------|------|---|-----------------|
| 18    | 24  | 730.3611 | 729.3539  | 729.3545  | -0.83 | 0 | 24    | 0.78   | 6    | U | Y.LSPGELD.R     |
| 19    | 24  | 617.2776 | 616.2704  | 616.2704  | -0.07 | 0 | 20    | 0.84   | 1    | U | L.SPGEELD.R     |
| 30    | 34  | 492.2309 | 491.2236  | 491.2227  | 1.78  | 0 | 31    | 0.36   | 1    |   | F.VTSGE.R       |
| 62    | 72  | 534.7736 | 1067.5327 | 1067.536  | -3.08 | 0 | 28    | 0.18   | 1    | U | K.RPDVVSPGGNA.Y |
| 95    | 99  | 416.2502 | 415.2429  | 415.2431  | -0.36 | 0 | 16    | 0.57   | 1    |   | Y.GIVAG.D       |
| 95    | 104 | 471.2687 | 940.5229  | 940.523   | -0.11 | 0 | 66    | 0.0041 | 1    | U | Y.GIVAGDVTPI.E  |
| 105   | 109 | 546.2757 | 545.2684  | 545.2697  | -2.32 | 0 | 14    | 0.8    | 1    |   | I.EEIGV.V       |
| 107   | 111 | 444.2814 | 443.2742  | 443.2744  | -0.55 | 0 | 23    | 0.94   | 1    |   | E.IGVVG.V       |
| 108   | 112 | 430.2659 | 429.2587  | 429.2588  | -0.24 | 0 | 22    | 0.68   | 1    |   | I.GVVG.V.R      |
| 117   | 123 | 358.2208 | 714.427   | 714.4276  | -0.76 | 0 | 25    | 1.8    | 6    | U | Y.KSLGTPI.E     |
| 118   | 123 | 587.3398 | 586.3325  | 586.3326  | -0.2  | 0 | 18    | 0.84   | 1    | U | K.SLGTPI.E      |
| 118   | 124 | 716.3804 | 715.3732  | 715.3752  | -2.88 | 0 | 16    | 1.2    | 3    | U | K.SLGTPIE.A     |
| 142   | 146 | 478.1786 | 477.1713  | 477.1707  | 1.35  | 0 | 33    | 0.083  | 1    |   | L.SGEDA.A       |

**Protein gene: APCB\_ARTPT**

| Start | End | Observed | Mr (expt) | Mr (calc) | ppm    | M | Score | Expect | Rank | U | Peptide      |
|-------|-----|----------|-----------|-----------|--------|---|-------|--------|------|---|--------------|
| 1     | 6   | 678.3116 | 677.3043  | 677.3054  | -1.64  | 0 | 27    | 1.3    | 3    | U | - .MQDAIT.S  |
| 10    | 16  | 706.3016 | 705.2943  | 705.293   | 1.91   | 0 | 18    | 1.8    | 10   | U | I.NSSDVQG.K  |
| 12    | 16  | 505.2265 | 504.2192  | 504.218   | 2.37   | 0 | 19    | 0.66   | 3    | U | S.SDVQG.K    |
| 62    | 69  | 454.7265 | 907.4384  | 907.4399  | -1.71  | 0 | 52    | 0.0043 | 1    | U | L.YSDITRPG.G |
| 63    | 69  | 373.1959 | 744.3772  | 744.3766  | 0.83   | 0 | 32    | 7      | 9    | U | Y.SDITRPG.G  |
| 98    | 102 | 446.1881 | 445.1809  | 445.1809  | -0.029 | 0 | 20    | 0.51   | 1    |   | L.AGDPS.I    |
| 117   | 123 | 699.4024 | 698.3951  | 698.3963  | -1.66  | 0 | 24    | 0.98   | 1    | U | Y.NSLGVPI.G  |
| 135   | 139 | 476.2353 | 475.228   | 475.2278  | 0.39   | 0 | 12    | 0.56   | 1    |   | K.EVTAG.L    |

|     |     |          |          |          |       |   |    |      |   |  |           |
|-----|-----|----------|----------|----------|-------|---|----|------|---|--|-----------|
| 139 | 143 | 416.2497 | 415.2424 | 415.2431 | -1.61 | 0 | 26 | 0.14 | 1 |  | A.GLVGA.D |
|-----|-----|----------|----------|----------|-------|---|----|------|---|--|-----------|

Protein gene:  
Phycoalfa\_ARTPT

| Start | End | Observed | Mr (expt) | Mr (calc) | ppm   | M | Score | Expect | Rank | U | Peptide                                   |
|-------|-----|----------|-----------|-----------|-------|---|-------|--------|------|---|-------------------------------------------|
| 10    | 14  | 492.2306 | 491.2233  | 491.2227  | 1.18  | 0 | 16    | 1.6    | 5    |   | V.SIADS.Q                                 |
| 10    | 16  | 677.3084 | 676.3011  | 676.3028  | -2.52 | 0 | 22    | 0.6    | 1    | U | V.SIADSQG.R                               |
| 19    | 23  | 536.2566 | 535.2493  | 535.2489  | 0.69  | 0 | 7     | 1.1    | 2    |   | F.LSSTE.I                                 |
| 52    | 56  | 418.2304 | 417.2231  | 417.2223  | 1.91  | 0 | 22    | 0.59   | 1    |   | L.ISGAA.Q                                 |
| 66    | 73  | 446.6953 | 891.3761  | 891.3756  | 0.55  | 0 | 18    | 3.1    | 6    | U | Y.TTQM <del>Q</del> GPN.Y + Oxidation (M) |
| 99    | 107 | 816.4274 | 815.4202  | 815.4211  | -1.19 | 0 | 22    | 0.57   | 1    | U | C.LIAGGTGPM.D                             |
| 100   | 107 | 703.3455 | 702.3382  | 702.3371  | 1.68  | 0 | 21    | 2.9    | 4    | U | L.IAGGTGPM.D                              |
| 101   | 107 | 590.2595 | 589.2522  | 589.253   | -1.39 | 0 | 37    | 1.2    | 4    | U | I.AGGTGPM.D                               |
| 102   | 107 | 519.2229 | 518.2156  | 518.2159  | -0.53 | 0 | 17    | 1.3    | 5    | U | A.GGTGPM.D                                |
| 111   | 115 | 486.3282 | 485.3209  | 485.3213  | -0.78 | 0 | 35    | 0.067  | 1    |   | Y.LIAGI.D                                 |
| 112   | 117 | 617.3143 | 616.307   | 616.3068  | 0.33  | 0 | 45    | 0.28   | 1    |   | L.IAGIDE.I                                |
| 121   | 127 | 780.3781 | 779.3708  | 779.3701  | 0.9   | 0 | 28    | 2.8    | 4    | U | R.TFELSPS.W                               |
| 122   | 127 | 679.3305 | 678.3232  | 678.3224  | 1.15  | 0 | 29    | 0.82   | 1    | U | T.FELSPS.W                                |
| 123   | 127 | 532.2578 | 531.2505  | 531.254   | -6.69 | 0 | 12    | 0.21   | 1    |   | F.ELSPS.W                                 |
| 143   | 147 | 420.1724 | 419.1651  | 419.1652  | -0.18 | 0 | 19    | 0.58   | 1    |   | L.SGDAA.T                                 |

Protein gene:  
Phycobeta\_ARTPT

|    |    |          |          |          |       |   |    |      |   |   |                                          |
|----|----|----------|----------|----------|-------|---|----|------|---|---|------------------------------------------|
| 5  | 10 | 340.7022 | 679.3898 | 679.3905 | -1    | 0 | 24 | 0.75 | 1 | U | A.FTKVVS.Q                               |
| 5  | 12 | 440.2499 | 878.4853 | 878.4862 | -0.97 | 0 | 33 | 0.94 | 1 | U | A.FTKVVSQA.D                             |
| 6  | 12 | 366.7152 | 731.4159 | 731.4178 | -2.5  | 0 | 25 | 1.6  | 4 | U | F.TKVVSQA.D                              |
| 12 | 18 | 390.1732 | 778.3319 | 778.3279 | 5.14  | 0 | 30 | 0.53 | 1 | U | Q.ADTRGEM.L                              |
| 13 | 18 | 354.6524 | 707.2903 | 707.2908 | -0.81 | 0 | 25 | 1.4  | 4 | U | A.DTRGEM.L                               |
| 13 | 19 | 419.1916 | 836.3687 | 836.3698 | -1.34 | 0 | 28 | 1.2  | 3 | U | A.DTRGEM <del>L</del> .S + Oxidation (M) |
| 19 | 23 | 519.2764 | 518.2692 | 518.27   | -1.67 | 0 | 19 | 1    | 1 | U | M.LSTAQ.I                                |

|     |     |          |           |           |       |   |    |       |   |   |                  |
|-----|-----|----------|-----------|-----------|-------|---|----|-------|---|---|------------------|
| 22  | 26  | 517.2618 | 516.2545  | 516.2544  | 0.27  | 0 | 24 | 0.57  | 1 |   | T.AQIDA.L        |
| 22  | 27  | 630.345  | 629.3377  | 629.3384  | -1.16 | 0 | 34 | 0.58  | 1 | U | T.AQIDAL.S       |
| 31  | 38  | 458.7633 | 915.5121  | 915.5137  | -1.78 | 0 | 31 | 1.6   | 5 | U | M.VAESNKRL.D     |
| 31  | 42  | 658.3506 | 1314.6867 | 1314.6891 | -1.83 | 0 | 35 | 0.047 | 1 | U | M.VAESNKRLDAVN.R |
| 41  | 48  | 437.7398 | 873.4651  | 873.4668  | -2    | 0 | 29 | 0.73  | 1 | U | A.VNRITSNA.S     |
| 43  | 50  | 425.2246 | 848.4346  | 848.4352  | -0.68 | 0 | 31 | 1.4   | 3 | U | N.RITSNAST.I     |
| 49  | 55  | 691.3605 | 690.3532  | 690.3548  | -2.34 | 0 | 23 | 0.53  | 1 | U | A.STIVSNA.A      |
| 51  | 55  | 503.2811 | 502.2738  | 502.2751  | -2.61 | 0 | 18 | 1.3   | 4 |   | T.IVSNA.A        |
| 61  | 66  | 685.3498 | 684.3425  | 684.3442  | -2.52 | 0 | 26 | 1.3   | 7 | U | F.AEQPQL.I       |
| 91  | 95  | 351.1842 | 700.3538  | 700.3544  | -0.89 | 0 | 15 | 0.77  | 1 |   | L.RYVTY.A        |
| 113 | 117 | 341.1817 | 680.3489  | 680.3493  | -0.6  | 0 | 19 | 0.77  | 1 |   | G.LRETY.L        |
| 118 | 126 | 802.431  | 801.4238  | 801.4232  | 0.65  | 0 | 27 | 0.42  | 1 | U | Y.LALGTPGSS.V    |
| 119 | 126 | 689.3442 | 688.337   | 688.3392  | -3.21 | 0 | 29 | 0.89  | 4 | U | L.ALGTPGSS.V     |
| 127 | 132 | 501.303  | 500.2957  | 500.2959  | -0.33 | 0 | 34 | 0.37  | 1 | U | S.VAVGVG.K       |
| 127 | 136 | 339.8632 | 1016.5677 | 1016.5688 | -1.09 | 0 | 19 | 1.2   | 2 | U | S.VAVGVGKMKE.A   |
| 129 | 136 | 424.2385 | 846.4624  | 846.4633  | -1.04 | 0 | 43 | 0.097 | 1 | U | A.VGVGKMKE.A     |
| 140 | 144 | 531.2756 | 530.2683  | 530.27    | -3.25 | 0 | 21 | 0.52  | 1 | U | L.AIVND.P        |

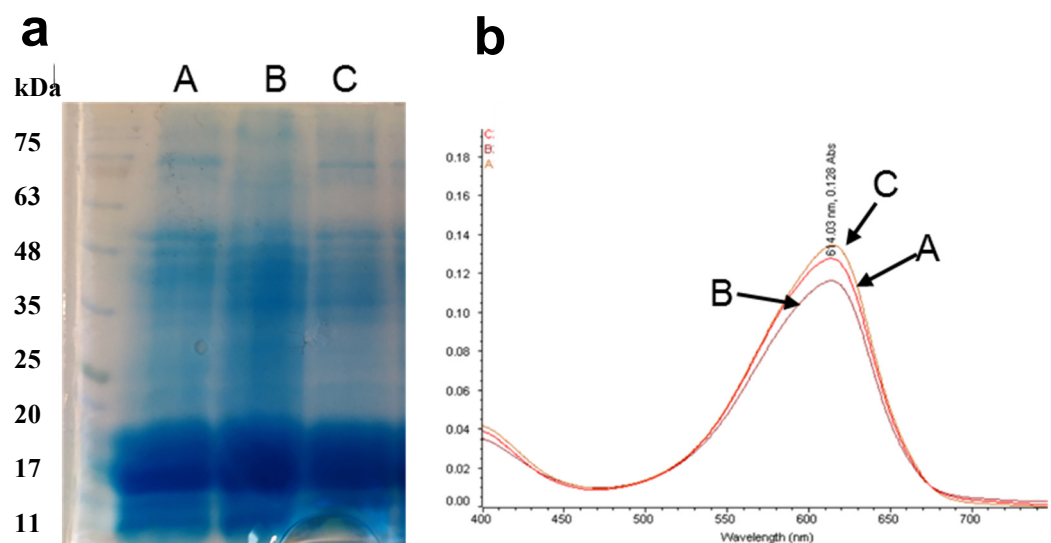

**Figure S1.** The extracted proteins were analyzed on 12% SDS-PAGE Tris–glycine buffer, under reducing conditions, followed by Coomassie Brilliant Blue staining (a) and UV spectra (b) of the protein component extracted from three different *Spirulina* samples (A, B and C).
